# Supplementary material for: A Co3O4–CeO2 functionalized SBA-15 monolith with a three-dimensional framework improves NOx-assisted soot combustion
Source: Royal Society of Chemistry journal article supplement (doi:10.1039/c4ra16832a), 2015-01-01
Supplement: c4ra16832a1.pdf [file c4ra16832a1.pdf]

## Supporting Information

### **Co<sub>3</sub>O<sub>4</sub>-CeO<sub>2</sub> functionalized SBA-15 monolith with three-dimensional framework improves NO<sub>x</sub>-assisted soot combustion**

Qiongqiong Yang,<sup>1,2</sup> Fangna Gu,<sup>2,\*</sup> Yufang Tang,<sup>1,\*</sup> Hui Zhang,<sup>2</sup> Qing Liu,<sup>2</sup>

Ziyi Zhong,<sup>3</sup> and Fabing Su<sup>2,\*</sup>

<sup>1</sup> *School of Chemical Engineering, Xiangtan University, Xiangtan 411105, Hunan, China*

<sup>2</sup> *State Key Laboratory of Multiphase Complex Systems, Institute of Process Engineering, Chinese Academy of Sciences, Beijing 100190, China*

<sup>3</sup> *Institute of Chemical Engineering and Sciences, A\*star, 1 Pesek Road, Jurong Island, Singapore 627833, Singapore*

\*Corresponding author: [fngu@ipe.ac.cn](mailto:fngu@ipe.ac.cn) (F. Gu), [tyfchky@xtu.edu.cn](mailto:tyfchky@xtu.edu.cn) (Y. Tang), [fbsu@ipe.ac.cn](mailto:fbsu@ipe.ac.cn) (F. Su); Tel.: +86-10-82544850; Fax: +86-10-82544851

**Table S1** The temperatures and the selectivity to CO<sub>2</sub> for soot combustion over SM under different atmosphere

| Catalysts                                 | Treatment               | Atmosphere        | $T_{10}$ (°C) | $T_{50}$ (°C) | $T_{90}$ (°C) | $S_{CO_2}$ (%) |
|-------------------------------------------|-------------------------|-------------------|---------------|---------------|---------------|----------------|
| SM+soot,                                  | Mixed <sup>a</sup>      | O <sub>2</sub>    | 452           | 558           | 604           | 56             |
| SM+soot,                                  | Mixed <sup>a</sup>      | NO+O <sub>2</sub> | 446           | 558           | 601           | 56             |
| 2-Co <sub>0.2</sub> Ce <sub>0.8</sub> /SM | Mixed <sup>a</sup>      | NO+O <sub>2</sub> | 325           | 393           | 448           | 100            |
| 2-Co <sub>0.2</sub> Ce <sub>0.8</sub> /SM | Ultrasonic <sup>b</sup> | NO+O <sub>2</sub> | 293           | 345           | 378           | 100            |
| 2-Co <sub>0.2</sub> Ce <sub>0.8</sub> /SM | Mixed                   | O <sub>2</sub>    | 444           | 512           | 548           | 100            |

<sup>a</sup> Mixed, the catalysts and soot were mixed by spatula;

<sup>b</sup> Ultrasonic, the catalysts and soot were treated by ultrasonic.
